# Supplementary material for: Syntheses, structures, and luminescence properties of five new coordination polymers based on 3-carboxy-1-(3′-carboxybenzyl)-2-oxidopyridinium and neutral ligands
Source: Royal Society of Chemistry journal article supplement (doi:10.1039/d2ce00921h), 2022-01-01
Supplement: d2ce00921h1.pdf [file d2ce00921h1.pdf]

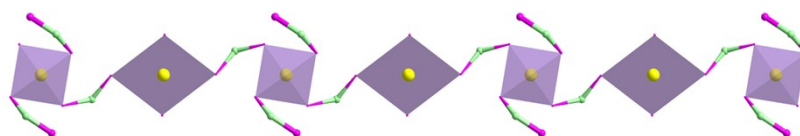

**Fig. S1** The rod-like metal ion chain in compound 3.

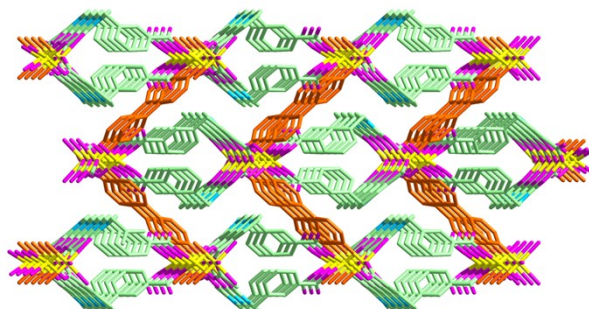

**Fig. S2** View of the 3D framework in compound 3.

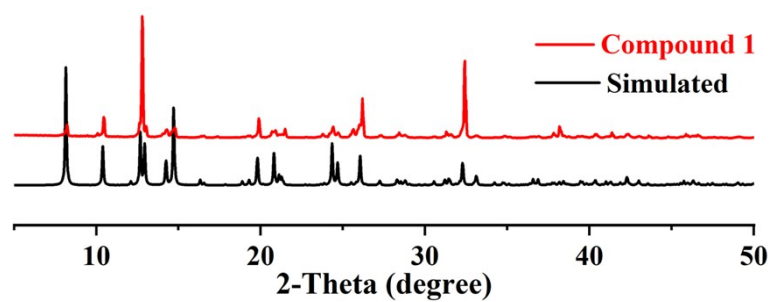

(a)

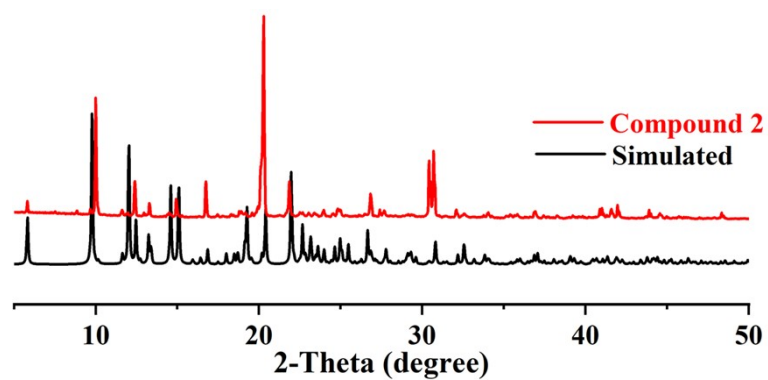

(b)

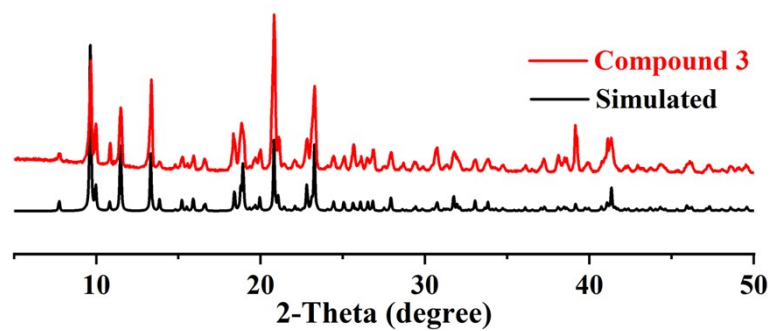

(c)

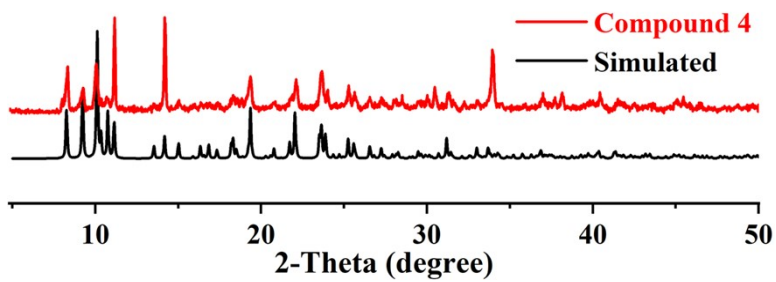

(d)

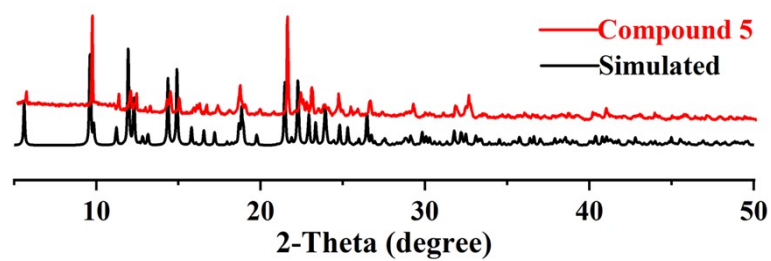

(e)

**Fig. S3** Simulated PXRD patterns of **1-5** (black) and PXRD patterns of the as-synthesized samples (red).

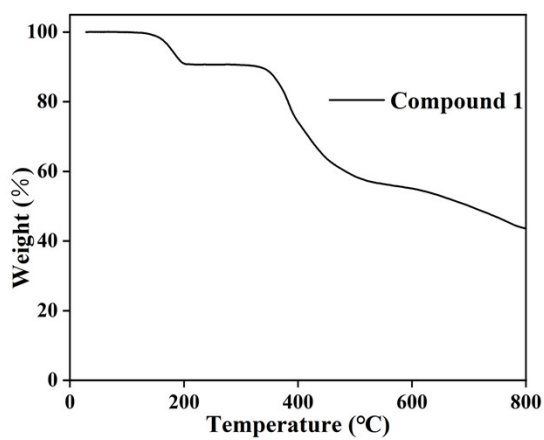

(a)

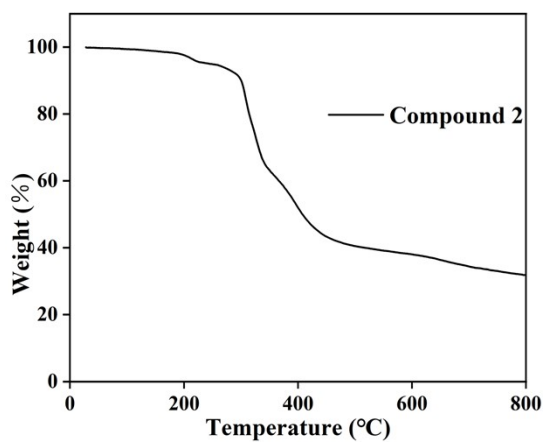

(b)

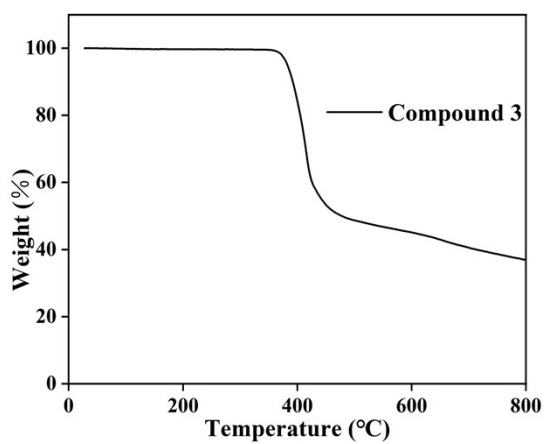

(c)

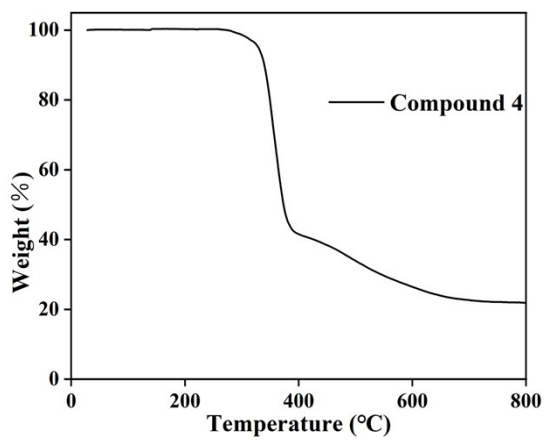

(d)

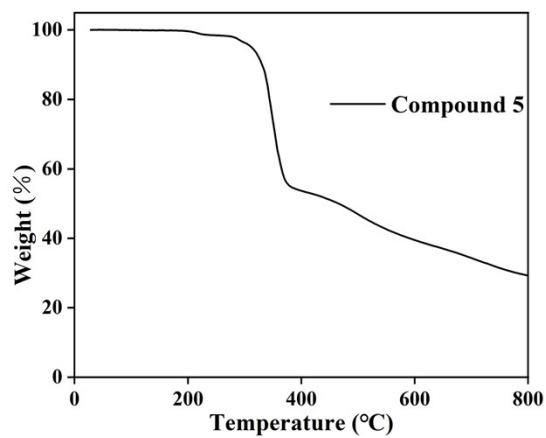

(e)

Fig. S4 TG curves of compounds 1-5.

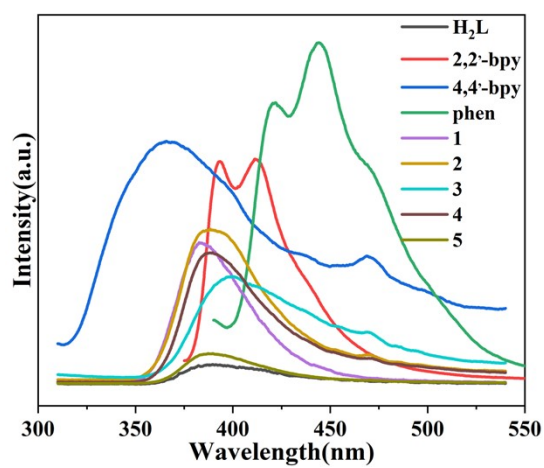

Fig. S5 Solid-state emission spectra at room temperature.

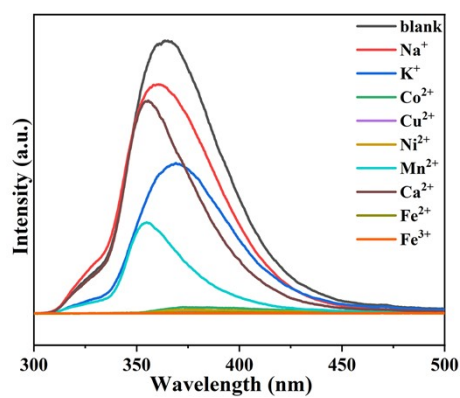

(a)

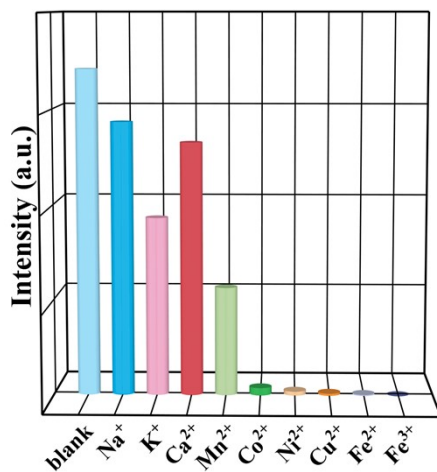

(b)

**Fig. S6** Luminescent spectra (a) and intensities (b) for compound **2** treated with 0.01 M different ions.

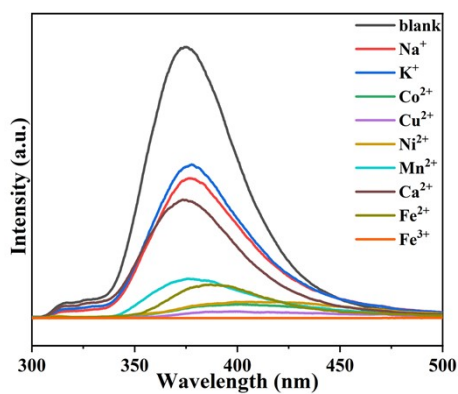

(a)

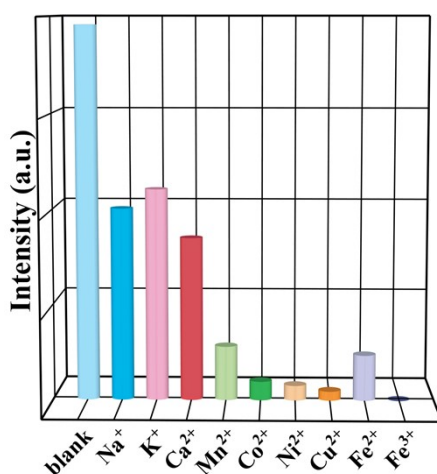

(b)

**Fig. S7** Luminescent spectra (a) and intensities (b) for compound **3** treated with 0.01 M different ions.

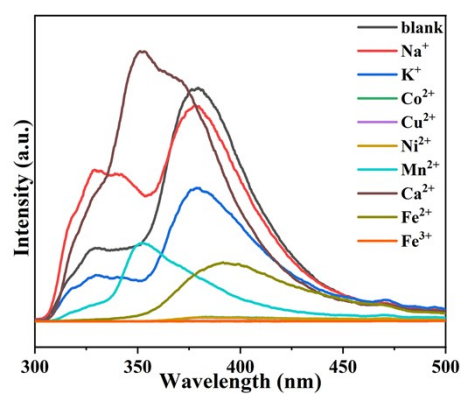

(a)

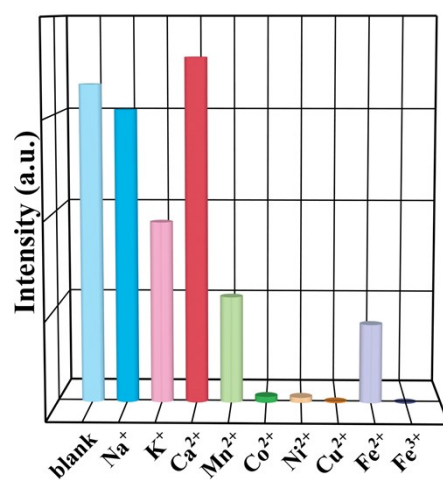

(b)

**Fig. S8** Luminescent spectra (a) and intensities (b) for compound **4** treated with 0.01 M different ions.

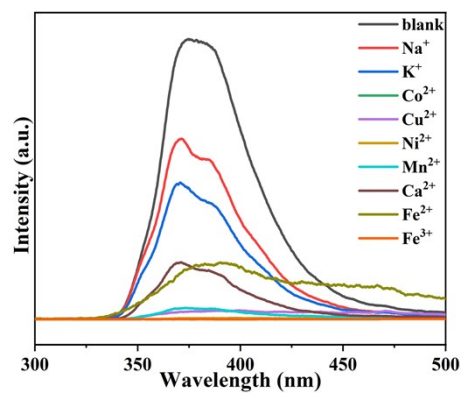

(a)

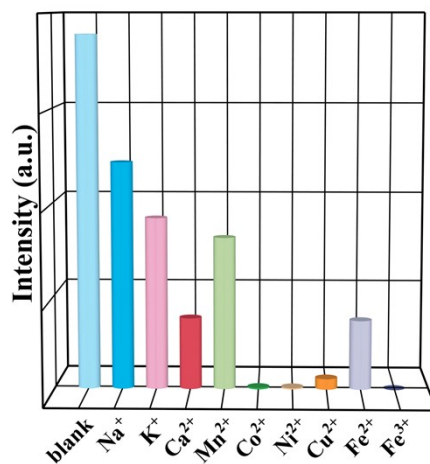

(b)

**Fig. S9** Luminescent spectra (a) and intensities (b) for compound **5** treated with 0.01 M different ions.

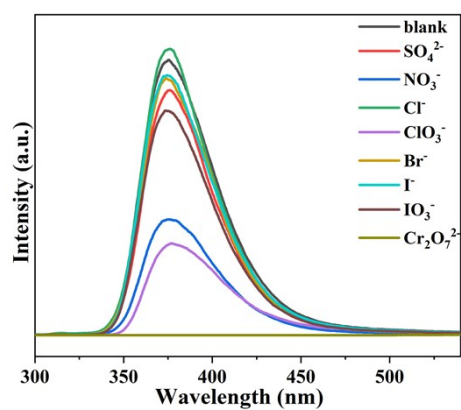

(a)

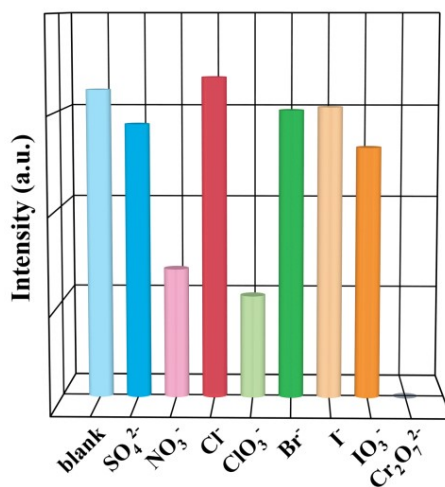

(b)

**Fig. S10** Luminescent spectra (a) and intensities (b) for compound **1** treated with 0.01 M different ions.

M different ions.

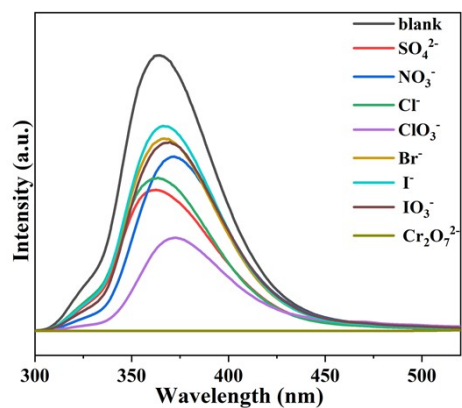

(a)

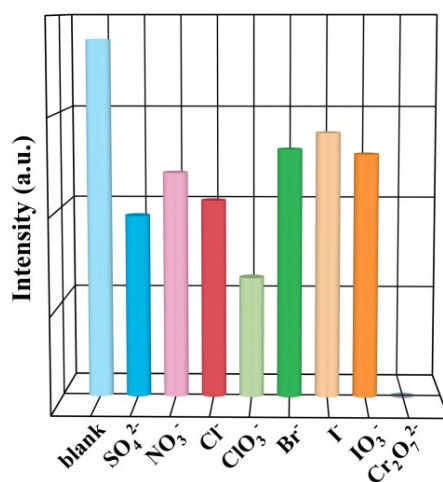

(b)

**Fig. S11** Luminescent spectra (a) and intensities (b) for compound **2** treated with 0.01 M different ions.

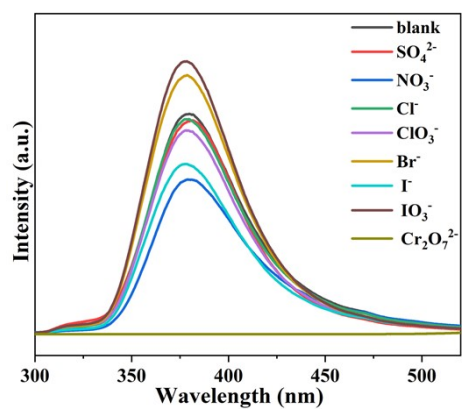

(a)



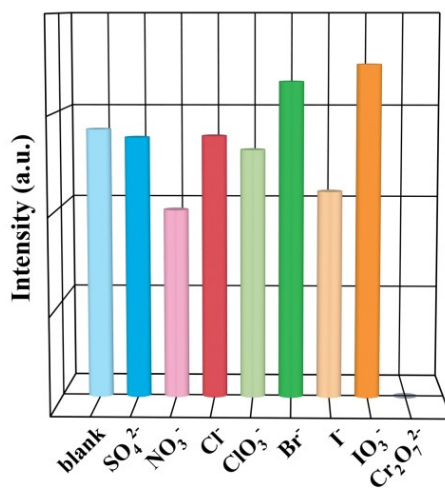

(b)

**Fig. S12** Luminescent spectra (a) and intensities (b) for compound **3** treated with 0.01 M different ions.

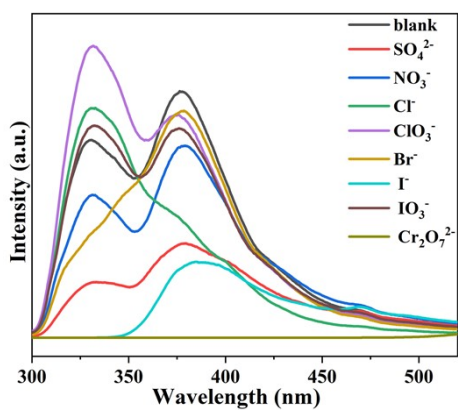

(a)

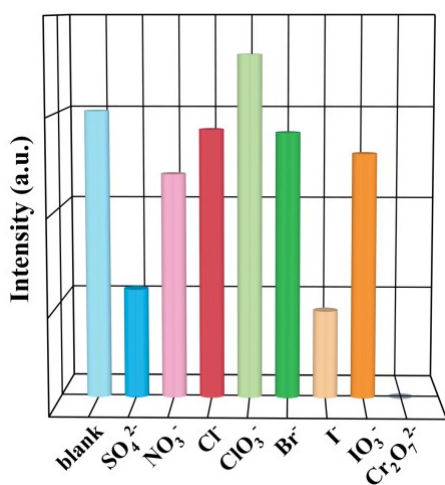

(b)

**Fig. S13** Luminescent spectra (a) and intensities (b) for compound **4** treated with 0.01

M different ions.

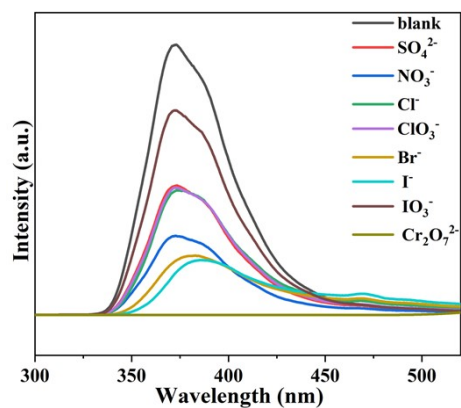

(a)

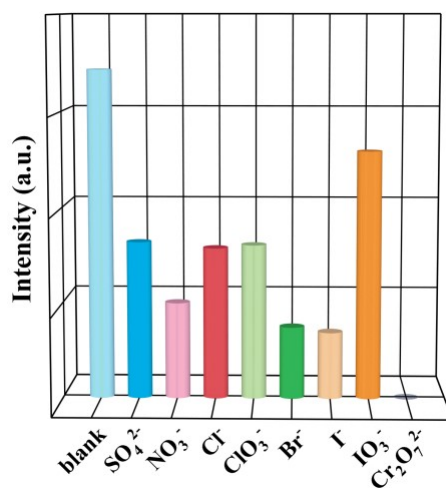

(b)

**Fig. S14** Luminescent spectra (a) and intensities (b) for compound **5** treated with 0.01 M different ions.

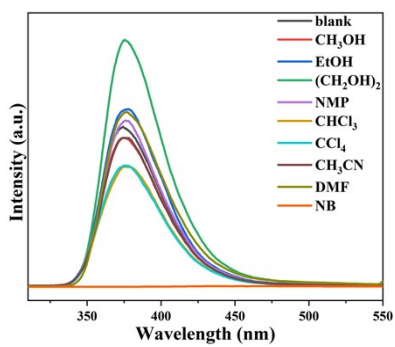

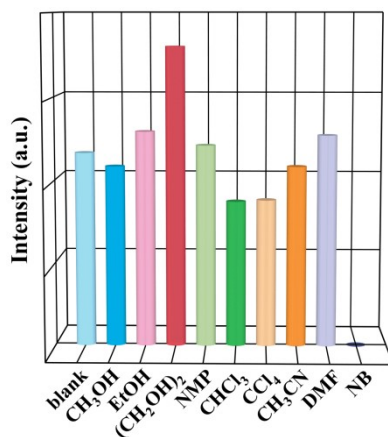

**Fig. S15** Luminescent spectra (a) and intensities (b) for compound **1** treated with different organic solvents.

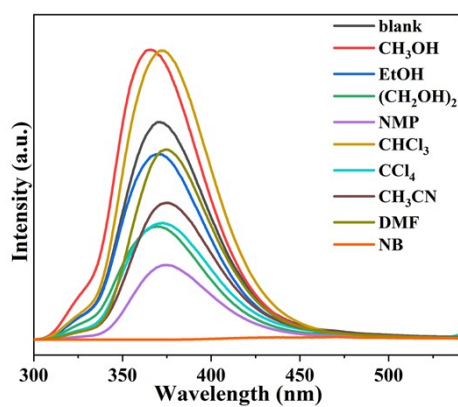

(a)

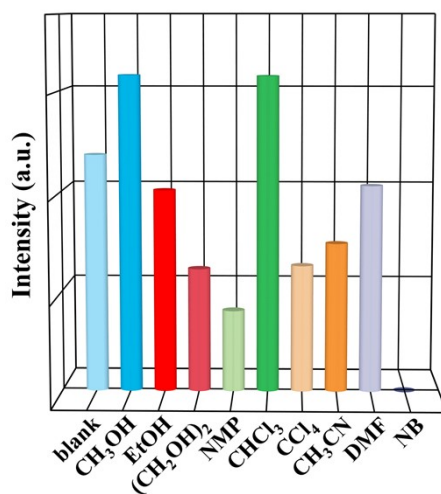

(b)

**Fig. S16** Luminescent spectra (a) and intensities (b) for compound **2** treated with different organic solvents.

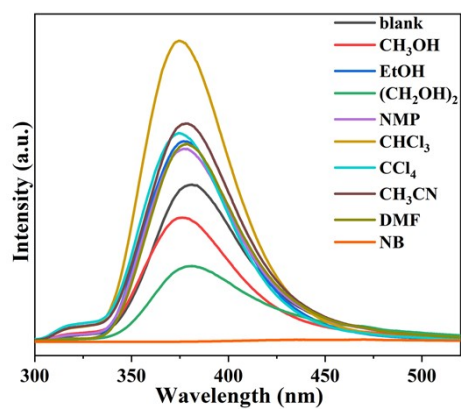

(a)

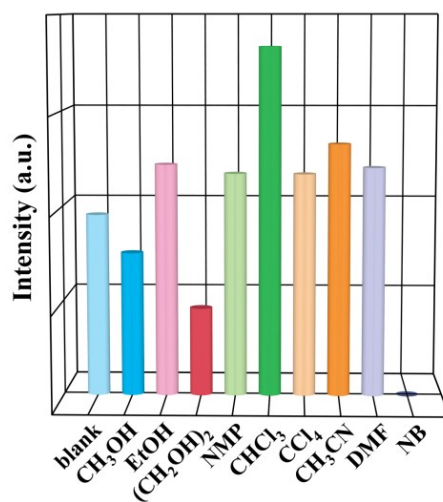

(b)

**Fig. S17** Luminescent spectra (a) and intensities (b) for compound **3** treated with different organic solvents.

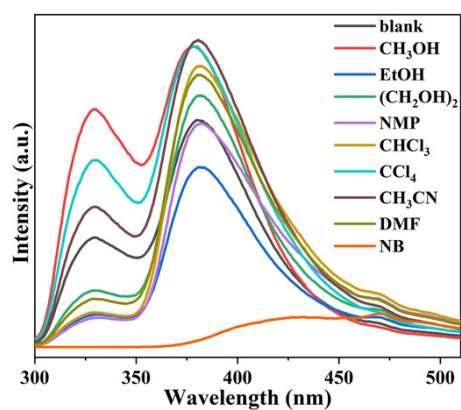

(a)

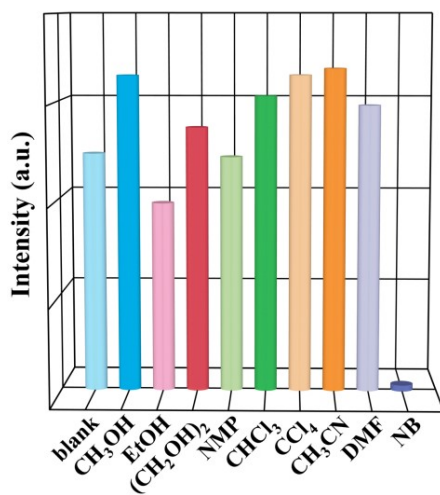

(b)

**Fig. S18** Luminescent spectra (a) and intensities (b) for compound **4** treated with different organic solvents.

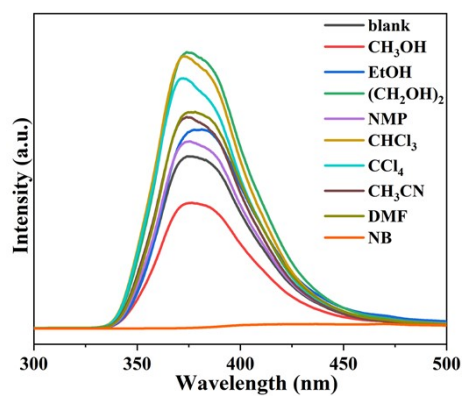

(a)

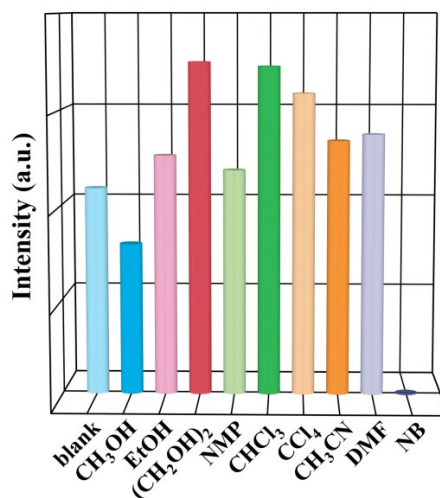

(b)

**Fig. S19** Luminescent spectra (a) and intensities (b) for compound **5** treated with

different organic solvents.

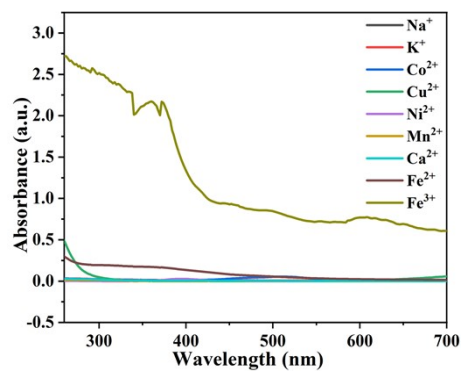

(a)

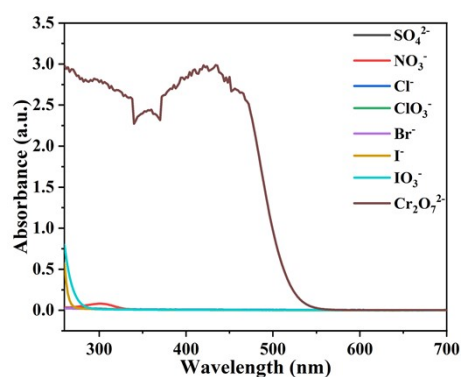

(b)

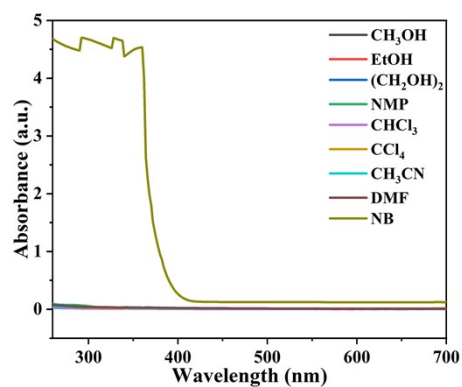

(c)

**Fig. S20** The UV-Vis absorption spectra of cations, anions, and organic small molecules.

**Table S1** Selected bond distances (Å) and angles (°) for **1**.

|                                              |            |                                |            |
|----------------------------------------------|------------|--------------------------------|------------|
| Zn(1)-O(3)                                   | 2.0091(12) | Zn(1)-O(1W)                    | 2.0531(13) |
| Zn(1)-O(5) <sup>#1</sup>                     | 2.0837(12) | Zn(1)-O(1)                     | 2.0924(11) |
| Zn(1)-O(2W)                                  | 2.1676(12) | Zn(1)-O(1) <sup>#2</sup>       | 2.1835(11) |
| O(3)-Zn(1)-O(1W)                             | 98.93(5)   | O(3)-Zn(1)-O(5) <sup>#1</sup>  | 93.57(5)   |
| O(1W)-Zn(1)-O(5) <sup>#1</sup>               | 95.86(5)   | O(3)-Zn(1)-O(1)                | 86.06(5)   |
| O(1W)-Zn(1)-O(1)                             | 174.81(5)  | O(5) <sup>#1</sup> -Zn(1)-O(1) | 85.21(5)   |
| O(3)-Zn(1)-O(2W)                             | 93.11(5)   | O(1W)-Zn(1)-O(2W)              | 92.48(5)   |
| O(5) <sup>#1</sup> -Zn(1)-O(2W)              | 168.38(5)  | O(1)-Zn(1)-O(2W)               | 85.77(4)   |
| O(3)-Zn(1)-O(1) <sup>#2</sup>                | 166.30(5)  | O(1W)-Zn(1)-O(1) <sup>#2</sup> | 94.27(5)   |
| O(5) <sup>#1</sup> -Zn(1)-O(1) <sup>#2</sup> | 88.70(5)   | O(1)-Zn(1)-O(1) <sup>#2</sup>  | 80.66(4)   |
| O(2W)-Zn(1)-O(1) <sup>#2</sup>               | 82.61(4)   | C(1)-O(1)-Zn(1)                | 129.23(10) |
| C(1)-O(1)-Zn(1) <sup>#2</sup>                | 125.80(10) | Zn(1)-O(1)-Zn(1) <sup>#2</sup> | 99.34(4)   |
| C(3)-O(3)-Zn(1)                              | 125.24(11) | C(14)-O(5)-Zn(1) <sup>#1</sup> | 126.27(11) |

Symmetry transformations used to generate equivalent atoms: <sup>#1</sup> -x+1,-y+2,-z+1; <sup>#2</sup> -x+1,-y+2,-z+2.

**Table S2** Selected bond distances (Å) and angles (°) for **2**.

|                                              |            |                                 |            |
|----------------------------------------------|------------|---------------------------------|------------|
| Zn(1)-O(5)                                   | 2.0592(13) | Zn(1)-O(2) <sup>#1</sup>        | 2.0992(13) |
| Zn(1)-O(3) <sup>#1</sup>                     | 2.1002(12) | Zn(1)-N(2)                      | 2.1469(14) |
| Zn(1)-O(1W)                                  | 2.1480(12) | Zn(1)-N(3)                      | 2.1528(14) |
| O(5)-Zn(1)-O(2) <sup>#1</sup>                | 85.12(5)   | O(5)-Zn(1)-O(3) <sup>#1</sup>   | 104.74(6)  |
| O(2) <sup>#1</sup> -Zn(1)-O(3) <sup>#1</sup> | 83.35(5)   | O(5)-Zn(1)-N(2)                 | 167.50(6)  |
| O(2) <sup>#1</sup> -Zn(1)-N(2)               | 96.58(5)   | O(3) <sup>#1</sup> -Zn(1)-N(2)  | 87.76(5)   |
| O(5)-Zn(1)-O(1W)                             | 85.98(5)   | O(2) <sup>#1</sup> -Zn(1)-O(1W) | 164.39(5)  |
| O(3) <sup>#1</sup> -Zn(1)-O(1W)              | 86.56(5)   | N(2)-Zn(1)-O(1W)                | 94.89(5)   |
| O(5)-Zn(1)-N(3)                              | 91.71(6)   | O(2) <sup>#1</sup> -Zn(1)-N(3)  | 89.99(5)   |
| O(3) <sup>#1</sup> -Zn(1)-N(3)               | 161.59(5)  | N(2)-Zn(1)-N(3)                 | 75.93(5)   |
| O(1W)-Zn(1)-N(3)                             | 103.07(5)  | C(15)-N(2)-Zn(1)                | 124.95(12) |
| C(19)-N(2)-Zn(1)                             | 116.09(11) | C(24)-N(3)-Zn(1)                | 125.46(12) |

|                               |            |                               |            |
|-------------------------------|------------|-------------------------------|------------|
| C(20)-N(3)-Zn(1)              | 116.07(11) | C(1)-O(2)-Zn(1) <sup>#2</sup> | 125.13(11) |
| C(6)-O(3)-Zn(1) <sup>#2</sup> | 125.89(11) | C(14)-O(5)-Zn(1)              | 136.29(12) |

Symmetry transformations used to generate equivalent atoms: <sup>#1</sup> x,y+1,z; <sup>#2</sup> x,y-1,z.

**Table S3** Hydrogen bonds for **2** (Å and °).

| D-H···A          | d(D-H)   | d(H···A)  | d(D···A)   | ∠(DHA) |
|------------------|----------|-----------|------------|--------|
| C7-H7A···O1      | 0.97     | 2.61      | 3.543      | 162.7  |
| C15-H15···O3     | 0.93     | 2.47      | 3.016(2)   | 117.6  |
| O1W-<br>H1A···O4 | 0.890(9) | 1.874(11) | 2.7402(17) | 164(2) |

Symmetry transformations used to generate equivalent atoms: <sup>#1</sup> x,y+1,z; <sup>#2</sup> x,y-1,z.

**Table S4** Selected bond distances (Å) and angles (°) for **3**.

|                                              |            |                                              |            |
|----------------------------------------------|------------|----------------------------------------------|------------|
| Zn(1)-O(1)                                   | 2.0713(12) | Zn(1)-O(1) <sup>#1</sup>                     | 2.0713(12) |
| Zn(1)-O(3) <sup>#1</sup>                     | 2.1075(12) | Zn(1)-O(3)                                   | 2.1076(12) |
| Zn(1)-N(2)                                   | 2.1715(14) | Zn(1)-N(2) <sup>#1</sup>                     | 2.1715(14) |
| Zn(2)-O(5) <sup>#1</sup>                     | 1.9413(13) | Zn(2)-O(5)                                   | 1.9413(13) |
| Zn(2)-O(2) <sup>#2</sup>                     | 1.9667(13) | Zn(2)-O(2) <sup>#3</sup>                     | 1.9667(13) |
| O(1)-Zn(1)-O(1) <sup>#1</sup>                | 173.56(7)  | O(1)-Zn(1)-O(3) <sup>#1</sup>                | 89.71(5)   |
| O(1) <sup>#1</sup> -Zn(1)-O(3) <sup>#1</sup> | 85.90(5)   | O(1)-Zn(1)-O(3)                              | 85.90(5)   |
| O(1) <sup>#1</sup> -Zn(1)-O(3)               | 89.71(5)   | O(3) <sup>#1</sup> -Zn(1)-O(3)               | 93.94(8)   |
| O(1)-Zn(1)-N(2)                              | 91.63(5)   | O(1) <sup>#1</sup> -Zn(1)-N(2)               | 93.08(5)   |
| O(3) <sup>#1</sup> -Zn(1)-N(2)               | 175.83(5)  | O(3)-Zn(1)-N(2)                              | 90.09(5)   |
| O(1)-Zn(1)-N(2) <sup>#1</sup>                | 93.08(5)   | O(1) <sup>#1</sup> -Zn(1)-N(2) <sup>#1</sup> | 91.63(5)   |
| O(3) <sup>#1</sup> -Zn(1)-N(2) <sup>#1</sup> | 90.10(5)   | O(3)-Zn(1)-N(2) <sup>#1</sup>                | 175.83(5)  |
| N(2)-Zn(1)-N(2) <sup>#1</sup>                | 85.89(7)   | O(5) <sup>#1</sup> -Zn(2)-O(5)               | 98.24(8)   |
| O(5) <sup>#1</sup> -Zn(2)-O(2) <sup>#2</sup> | 116.70(6)  | O(5)-Zn(2)-O(2) <sup>#2</sup>                | 115.68(6)  |
| O(5) <sup>#1</sup> -Zn(2)-O(2) <sup>#3</sup> | 115.68(6)  | O(5)-Zn(2)-O(2) <sup>#3</sup>                | 116.70(6)  |
| O(2) <sup>#2</sup> -Zn(2)-O(2) <sup>#3</sup> | 95.19(9)   | C(15)-N(2)-Zn(1)                             | 121.82(12) |



|                               |            |                 |            |
|-------------------------------|------------|-----------------|------------|
| C(19)-N(2)-Zn(1)              | 120.69(12) | C(1)-O(1)-Zn(1) | 129.11(11) |
| C(1)-O(2)-Zn(2) <sup>#5</sup> | 121.84(12) | C(3)-O(3)-Zn(1) | 128.40(12) |
| C(14)-O(5)-Zn(2)              | 113.42(12) |                 |            |

Symmetry transformations used to generate equivalent atoms: <sup>#1</sup> x,-y+1/2,-z+3/2; <sup>#2</sup> x-1/2,-y+1/2,z+1/2; <sup>#3</sup> x-1/2,y,-z+1; <sup>#4</sup> -x+3/2,-y+1,z; <sup>#5</sup> x+1/2,y,-z+1.

**Table S5** Selected bond distances (Å) and angles (°) for **4**.

|                                               |            |                                              |            |
|-----------------------------------------------|------------|----------------------------------------------|------------|
| Cd(1)-O(1)                                    | 2.1984(16) | Cd(1)-O(3) <sup>#1</sup>                     | 2.3175(15) |
| Cd(1)-O(3) <sup>#2</sup>                      | 2.3254(15) | Cd(1)-O(5) <sup>#1</sup>                     | 2.3473(15) |
| Cd(1)-N(3)                                    | 2.3520(18) | Cd(1)-N(2)                                   | 2.3635(18) |
| O(1)-Cd(1)-O(3) <sup>#1</sup>                 | 114.17(6)  | O(1)-Cd(1)-O(3) <sup>#2</sup>                | 93.98(7)   |
| O(3) <sup>#1</sup> -Cd(1)-O(3) <sup>#2</sup>  | 69.52(6)   | O(1)-Cd(1)-O(5) <sup>#1</sup>                | 99.21(7)   |
| O(3) <sup>#1</sup> -Cd(1)-O(5) <sup>#1</sup>  | 74.65(5)   | O(3) <sup>#2</sup> -Cd(1)-O(5) <sup>#1</sup> | 144.14(5)  |
| O(1)-Cd(1)-N(3)                               | 156.02(7)  | O(3) <sup>#1</sup> -Cd(1)-N(3)               | 89.76(6)   |
| O(3) <sup>#2</sup> -Cd(1)-N(3)                | 96.08(6)   | O(5) <sup>#1</sup> -Cd(1)-N(3)               | 85.12(6)   |
| O(1)-Cd(1)-N(2)                               | 86.60(6)   | O(3) <sup>#1</sup> -Cd(1)-N(2)               | 154.78(6)  |
| O(3) <sup>#2</sup> -Cd(1)-N(2)                | 125.64(6)  | O(5) <sup>#1</sup> -Cd(1)-N(2)               | 88.51(6)   |
| N(3)-Cd(1)-N(2)                               | 69.86(6)   | C(15)-N(2)-Cd(1)                             | 123.57(16) |
| C(19)-N(2)-Cd(1)                              | 117.67(14) | C(24)-N(3)-Cd(1)                             | 122.77(15) |
| C(20)-N(3)-Cd(1)                              | 118.29(14) | C(1)-O(1)-Cd(1)                              | 131.07(15) |
| C(14)-O(3)-Cd(1) <sup>#3</sup>                | 139.00(14) | C(14)-O(3)-Cd(1) <sup>#2</sup>               | 108.41(13) |
| Cd(1) <sup>#3</sup> -O(3)-Cd(1) <sup>#2</sup> | 110.48(6)  | C(13)-O(5)-Cd(1) <sup>#3</sup>               | 133.59(14) |

Symmetry transformations used to generate equivalent atoms: <sup>#1</sup> x-1,y,z; <sup>#2</sup> -x+1,-y+1,-z+1; <sup>#3</sup> x+1,y,z.

**Table S6** Hydrogen bonds for **4** (Å and °).

| D-H...A     | d(D-H) | d(H...A) | d(D...A) | ∠(DHA) |
|-------------|--------|----------|----------|--------|
| C8-H8B...O2 | 0.970  | 2.399    | 3.298    | 153.82 |
| C9-H9...O2  | 0.930  | 2.423    | 3.281    | 153.35 |

|                     |       |       |       |        |
|---------------------|-------|-------|-------|--------|
| C15-H15 $\cdots$ O1 | 0.930 | 2.565 | 3.164 | 122.54 |
|---------------------|-------|-------|-------|--------|

Symmetry transformations used to generate equivalent atoms: <sup>#1</sup> x-1,y,z; <sup>#2</sup> -x+1,-y+1,-z+1; <sup>#3</sup> x+1,y,z.

**Table S7** Selected bond distances (Å) and angles (°) for **5**.

|                                 |            |                                |            |
|---------------------------------|------------|--------------------------------|------------|
| Cd(1)-O(1)                      | 2.2210(13) | Cd(1)-O(5) <sup>#1</sup>       | 2.2748(12) |
| Cd(1)-O(3)                      | 2.2818(12) | Cd(1)-O(1W)                    | 2.3096(13) |
| Cd(1)-N(3)                      | 2.3579(14) | Cd(1)-N(2)                     | 2.3582(14) |
| O(1)-Cd(1)-O(5) <sup>#1</sup>   | 83.56(5)   | O(1)-Cd(1)-O(3)                | 78.21(5)   |
| O(5) <sup>#1</sup> -Cd(1)-O(3)  | 122.21(5)  | O(1)-Cd(1)-O(1W)               | 146.06(5)  |
| O(5) <sup>#1</sup> -Cd(1)-O(1W) | 81.03(5)   | O(3)-Cd(1)-O(1W)               | 84.78(5)   |
| O(1)-Cd(1)-N(3)                 | 96.43(5)   | O(5) <sup>#1</sup> -Cd(1)-N(3) | 82.43(5)   |
| O(3)-Cd(1)-N(3)                 | 153.34(5)  | O(1W)-Cd(1)-N(3)               | 111.17(5)  |
| O(1)-Cd(1)-N(2)                 | 107.83(5)  | O(5) <sup>#1</sup> -Cd(1)-N(2) | 151.56(5)  |
| O(3)-Cd(1)-N(2)                 | 86.02(5)   | O(1W)-Cd(1)-N(2)               | 99.94(5)   |
| N(3)-Cd(1)-N(2)                 | 70.64(5)   | C(15)-N(2)-Cd(1)               | 125.18(12) |
| C(19)-N(2)-Cd(1)                | 116.12(11) | C(26)-N(3)-Cd(1)               | 125.08(12) |
| C(23)-N(3)-Cd(1)                | 116.51(11) | C(1)-O(1)-Cd(1)                | 137.32(11) |
| C(6)-O(3)-Cd(1)                 | 130.04(11) | C(14)-O(5)-Cd(1) <sup>#2</sup> | 124.80(11) |
| Cd(1)-O(1W)-H(1A)               | 121.3(15)  | Cd(1)-O(1W)-H(1B)              | 100.6(16)  |

Symmetry transformations used to generate equivalent atoms: <sup>#1</sup> x,-y+1,z+1/2; <sup>#2</sup> x,-y+1,z-1/2.

**Table S8** Hydrogen bonds for **5** (Å and °).

| D-H $\cdots$ A     | d(D-H) | d(H $\cdots$ A) | d(D $\cdots$ A) | $\angle$ (DHA) |
|--------------------|--------|-----------------|-----------------|----------------|
| C5-H5 $\cdots$ O4  | 0.92   | 2.65            | 3.269(2)        | 124.9          |
| C7-H7B $\cdots$ O2 | 0.97   | 2.49            | 3.428(2)        | 165.4          |

Symmetry transformations used to generate equivalent atoms: <sup>#1</sup> x,-y+1,z+1/2; <sup>#2</sup> x,-y+1,z-1/2.
